# Supplementary material for: Effects of Nonnutritive Sweeteners on Body Composition Changes during Pubertal Growth
Source: MDPI journal article supplement (doi:10.3390/nu15102319), 2023-05-15
Supplement: s1 [file s1]

## Online Supplementary Materials

|                                                                                                                               |   |
|-------------------------------------------------------------------------------------------------------------------------------|---|
| Online Supplementary Materials.....                                                                                           | 1 |
| Table S1. Associations between urinary concentrations of three sweeteners and body composition (n = 455).....                 | 2 |
| Table S2. Baseline characteristics of the sweetener consumption.....                                                          | 3 |
| Table S3. Associations of sweetener consumption with fat mass and fat-free mass among girls, by Tanner stage (n = 1239) ..... | 4 |
| Table S4. Associations of sweetener consumption with fat mass and fat-free mass among boys, by Tanner stage (n = 654).....    | 6 |
| Table S5. Associations of sweetener consumption with fat mass and fat-free mass, by obesity group (n = 1893) .....            | 8 |

**Table S1. Associations between urinary concentrations of three sweeteners and body composition (n = 455)**

| Sweetener           | Exposure amount* | BMI-z score |        |      |         | Fat mass % |        |       |             | Fat-free mass % |        |      |             | Waist-to-height ratio |        |      |         |
|---------------------|------------------|-------------|--------|------|---------|------------|--------|-------|-------------|-----------------|--------|------|-------------|-----------------------|--------|------|---------|
|                     |                  | $\beta$     | 95% CI |      | P value | $\beta$    | 95% CI |       | P value     | $\beta$         | 95% CI |      | P value     | $\beta$               | 95% CI |      | P value |
| <b>Acesulfame-K</b> | 0                | ref         | -      | -    | -       | ref        | -      | -     | -           | ref             | -      | -    | -           | ref                   | -      | -    | -       |
|                     | T1               | 0.02        | -0.44  | 0.47 | 0.95    | 0.05       | -3.11  | 3.22  | 0.97        | -0.02           | -3.18  | 3.15 | 0.99        | <0.01                 | -0.03  | 0.02 | 0.90    |
|                     | T2               | <0.01       | -0.44  | 0.43 | 1.00    | -0.29      | -3.40  | 2.82  | 0.86        | 0.29            | -2.82  | 3.40 | 0.85        | <0.01                 | -0.02  | 0.03 | 0.79    |
|                     | T3               | 0.17        | -0.25  | 0.60 | 0.42    | 1.15       | -1.88  | 4.17  | 0.46        | -1.14           | -4.17  | 1.88 | 0.46        | 0.01                  | -0.02  | 0.03 | 0.48    |
| <b>Sucralose</b>    | 0                | ref         | -      | -    | -       | ref        | -      | -     | -           | ref             | -      | -    | -           | ref                   | -      | -    | -       |
|                     | T1               | -0.30       | -0.67  | 0.07 | 0.11    | -3.00      | -5.59  | -0.41 | <b>0.02</b> | 3.02            | 0.43   | 5.61 | <b>0.02</b> | -0.01                 | -0.03  | 0.01 | 0.42    |
|                     | T2               | -0.06       | -0.40  | 0.28 | 0.74    | -0.30      | -2.71  | 2.11  | 0.81        | 0.32            | -2.09  | 2.73 | 0.79        | 0.01                  | -0.01  | 0.03 | 0.22    |
|                     | T3               | -0.08       | -0.42  | 0.25 | 0.62    | -0.17      | -2.47  | 2.13  | 0.88        | 0.19            | -2.10  | 2.49 | 0.87        | -0.01                 | -0.03  | 0.01 | 0.30    |
| <b>Stevioside</b>   | 0                | ref         | -      | -    | -       | ref        | -      | -     | -           | ref             | -      | -    | -           | ref                   | -      | -    | -       |
|                     | T1               | 0.02        | -0.38  | 0.42 | 0.91    | 0.22       | -2.61  | 3.04  | 0.88        | -0.23           | -3.05  | 2.59 | 0.87        | <0.01                 | -0.02  | 0.03 | 0.78    |
|                     | T2               | 0.23        | -0.12  | 0.58 | 0.19    | 1.14       | -1.30  | 3.58  | 0.36        | -1.13           | -3.57  | 1.31 | 0.36        | 0.01                  | -0.01  | 0.03 | 0.44    |
|                     | T3               | -0.30       | -0.66  | 0.05 | 0.10    | -2.23      | -4.76  | 0.29  | 0.08        | 2.23            | -0.29  | 4.76 | 0.08        | -0.01                 | -0.04  | 0.01 | 0.16    |

\*Exposure amount was estimated as the proportion of daily intake to ADI and was categorized into tertiles (T1–T3), with the no intake group as reference.

The models were adjusted for age, sex, amount of exercise, sleep quality, total energy intake, and parental education time.

**Table S2. Baseline characteristics of the sweetener consumption**

| Sweetener    | Exposure amount* | Girls  |        | Boys    |         | P value ** |
|--------------|------------------|--------|--------|---------|---------|------------|
|              |                  | Mean   | SD     | Mean    | SD      |            |
| Acesulfame-K | T1               | 0.12   | 0.08   | 0.17    | 0.13    | 0.01       |
|              | T2               | 0.7    | 0.39   | 1.03    | 0.56    | <0.01      |
|              | T3               | 4.47   | 5.39   | 9.06    | 12.14   | 0.01       |
| Aspartame    | T1               | 0.09   | 0.05   | 0.11    | 0.05    | 0.08       |
|              | T2               | 0.32   | 0.15   | 0.39    | 0.21    | 0.41       |
|              | T3               | 3.94   | 6.97   | 8.92    | 16.94   | 0.01       |
| Sucralose    | T1               | 0.18   | 0.1    | 0.18    | 0.12    | 0.12       |
|              | T2               | 0.8    | 0.51   | 1.06    | 0.68    | 0.03       |
|              | T3               | 7.36   | 8.98   | 12.95   | 13.84   | 0.01       |
| Glycyrrhizin | T1               | 0.02   | 0.01   | 0.02    | 0.02    | 0.03       |
|              | T2               | 0.07   | 0.03   | 0.08    | 0.04    | 0.05       |
|              | T3               | 0.33   | 0.33   | 0.33    | 0.37    | 0.13       |
| Stevioside   | T1               | 0.08   | 0.03   | 0.09    | 0.04    | 0.05       |
|              | T2               | 0.18   | 0.09   | 0.25    | 0.1     | 0.02       |
|              | T3               | 1.09   | 1.36   | 2.61    | 3.18    | 0.06       |
| Sorbitol     | T1               | 17.46  | 12.61  | 21.2    | 12.14   | 0.09       |
|              | T2               | 121.61 | 59.5   | 161.11  | 80.95   | 0.04       |
|              | T3               | 615.7  | 544.74 | 1077.69 | 1744.98 | 0.04       |
| Added sugar  | T1               | 1.05   | 0.7    | 1.45    | 1.13    | 0.02       |
|              | T2               | 4.11   | 1.74   | 5.28    | 2.38    | 0.06       |
|              | T3               | 18.58  | 15.43  | 23.2    | 15.32   | <0.01      |

\*Exposure amount was estimated as the proportion of daily intake to ADI and was categorized into tertiles (T1–T3), with the no intake group as reference. The models were adjusted for age, amount of exercise, sleep quality, total energy intake, and parental education time. \*\*P value reflects the difference between the early and late stages of pubertal growth

**Table S3. Associations of sweetener consumption with fat mass and fat-free mass among girls, by Tanner stage (n = 1239)**

| Sweetener    | Tanner stage     | Fat mass % |        |         |             |        |         |       |             | Fat-free mass % |       |        |         |             |        |         |       | P value **  |             |
|--------------|------------------|------------|--------|---------|-------------|--------|---------|-------|-------------|-----------------|-------|--------|---------|-------------|--------|---------|-------|-------------|-------------|
|              |                  | I & II     |        |         |             | III-V  |         |       |             | I & II          |       |        |         | III-V       |        |         |       |             |             |
|              | Exposure amount* | β          | 95% CI | P value | β           | 95% CI | P value | β     | 95% CI      | P value         | β     | 95% CI | P value | β           | 95% CI | P value |       |             |             |
| Acesulfame-K | 0                | ref        | -      | -       | -           | ref    | -       | -     | -           | -               | ref   | -      | -       | -           | ref    | -       | -     | -           | -           |
|              | T1               | 0.77       | -0.60  | 2.14    | 0.27        | -1.11  | -4.23   | 2.01  | 0.49        | 0.46            | -0.78 | -2.16  | 0.59    | 0.26        | 1.11   | -2.00   | 4.22  | 0.49        | 0.46        |
|              | T2               | -0.51      | -1.67  | 0.65    | 0.39        | -3.10  | -6.21   | 0.02  | 0.05        | 0.84            | 0.52  | -0.65  | 1.68    | 0.39        | 3.09   | -0.01   | 6.20  | 0.05        | 0.80        |
|              | T3               | -0.76      | -2.26  | 0.73    | 0.32        | -3.13  | -6.62   | 0.36  | 0.08        | 0.87            | 0.74  | -0.76  | 2.24    | 0.33        | 3.08   | -0.39   | 6.56  | 0.08        | 0.88        |
| Aspartame    | 0                | ref        | -      | -       | -           | ref    | -       | -     | -           | -               | ref   | -      | -       | -           | ref    | -       | -     | -           | -           |
|              | T1               | -0.41      | -1.37  | 0.55    | 0.40        | -2.28  | -4.21   | -0.36 | <b>0.02</b> | 0.30            | 0.39  | -0.57  | 1.35    | 0.43        | 2.23   | 0.31    | 4.14  | <b>0.02</b> | 0.32        |
|              | T2               | -1.12      | -2.22  | -0.02   | <b>0.05</b> | -3.15  | -5.53   | -0.77 | <b>0.01</b> | 0.84            | 1.15  | 0.05   | 2.25    | <b>0.04</b> | 3.17   | 0.80    | 5.54  | <b>0.01</b> | 0.83        |
|              | T3               | -1.34      | -2.39  | -0.29   | <b>0.01</b> | -2.99  | -5.88   | -0.11 | <b>0.04</b> | 0.93            | 1.32  | 0.27   | 2.38    | <b>0.01</b> | 2.98   | 0.10    | 5.86  | <b>0.04</b> | 0.90        |
| Sucralose    | 0                | ref        | -      | -       | -           | ref    | -       | -     | -           | -               | ref   | -      | -       | -           | ref    | -       | -     | -           | -           |
|              | T1               | -0.73      | -1.70  | 0.25    | 0.14        | 3.13   | 0.43    | 5.83  | <b>0.02</b> | <b>0.02</b>     | 0.76  | -0.22  | 1.73    | 0.13        | -3.10  | -5.80   | -0.40 | <b>0.03</b> | <b>0.02</b> |
|              | T2               | -0.21      | -1.23  | 0.80    | 0.68        | -2.28  | -5.06   | 0.49  | 0.11        | 0.44            | 0.21  | -0.81  | 1.23    | 0.68        | 2.26   | -0.51   | 5.03  | 0.11        | 0.47        |
|              | T3               | -0.63      | -1.63  | 0.38    | 0.22        | -0.84  | -3.31   | 1.63  | 0.50        | 0.66            | 0.63  | -0.38  | 1.64    | 0.22        | 0.85   | -1.61   | 3.32  | 0.50        | 0.67        |
| Glycyrrhizin | 0                | ref        | -      | -       | -           | ref    | -       | -     | -           | -               | ref   | -      | -       | -           | ref    | -       | -     | -           | -           |
|              | T1               | -0.44      | -1.31  | 0.43    | 0.32        | -1.86  | -3.91   | 0.19  | 0.08        | 0.59            | 0.47  | -0.40  | 1.34    | 0.29        | 1.85   | -0.20   | 3.89  | 0.08        | 0.58        |
|              | T2               | -0.54      | -1.35  | 0.28    | 0.20        | -0.40  | -2.79   | 2.00  | 0.75        | 0.34            | 0.57  | -0.24  | 1.39    | 0.17        | 0.45   | -1.94   | 2.85  | 0.71        | 0.34        |
|              | T3               | -0.65      | -1.56  | 0.27    | 0.17        | -2.31  | -4.78   | 0.16  | 0.07        | <b>0.03</b>     | 0.68  | -0.24  | 1.60    | 0.15        | 2.34   | -0.12   | 4.81  | 0.06        | <b>0.03</b> |
| Stevioside   | 0                | ref        | -      | -       | -           | ref    | -       | -     | -           | -               | ref   | -      | -       | -           | ref    | -       | -     | -           | -           |
|              | T1               | 0.09       | -1.27  | 1.44    | 0.90        | -1.09  | -6.31   | 4.14  | 0.68        | 0.24            | -0.12 | -1.47  | 1.24    | 0.87        | -1.09  | -6.31   | 4.14  | 0.68        | 0.22        |
|              | T2               | -1.23      | -2.67  | 0.20    | 0.09        | -2.30  | -6.62   | 2.01  | 0.30        | 0.35            | 1.22  | -0.22  | 2.66    | 0.10        | -2.30  | -6.62   | 2.01  | 0.30        | 0.35        |
|              | T3               | -0.16      | -1.90  | 1.57    | 0.85        | 0.17   | -3.05   | 3.39  | 0.92        | 0.46            | 0.13  | -1.61  | 1.87    | 0.88        | 0.17   | -3.05   | 3.39  | 0.92        | 0.43        |
| Sorbitol     | 0                | ref        | -      | -       | -           | ref    | -       | -     | -           | -               | ref   | -      | -       | -           | ref    | -       | -     | -           | -           |
|              | T1               | 0.82       | -0.14  | 1.77    | 0.09        | -0.44  | -3.04   | 2.17  | 0.74        | 0.12            | -0.82 | -1.78  | 0.14    | 0.10        | 0.48   | -2.12   | 3.08  | 0.72        | 0.12        |
|              | T2               | 0.20       | -0.67  | 1.08    | 0.65        | -0.38  | -2.81   | 2.05  | 0.76        | 0.52            | -0.19 | -1.07  | 0.69    | 0.67        | 0.40   | -2.02   | 2.82  | 0.74        | 0.51        |
|              | T3               | -0.11      | -0.98  | 0.75    | 0.80        | -2.37  | -4.84   | 0.10  | 0.06        | 0.35            | 0.13  | -0.74  | 1.00    | 0.77        | 2.42   | -0.04   | 4.88  | 0.06        | 0.31        |
| Added sugar  | 0                | ref        | -      | -       | -           | ref    | -       | -     | -           | -               | ref   | -      | -       | -           | ref    | -       | -     | -           | -           |

|    |       |       |      |      |       |       |      |      |      |       |       |      |      |       |       |      |      |      |
|----|-------|-------|------|------|-------|-------|------|------|------|-------|-------|------|------|-------|-------|------|------|------|
| T1 | 0.32  | -0.43 | 1.07 | 0.40 | 0.31  | -1.75 | 2.38 | 0.77 | 0.42 | -0.32 | -1.07 | 0.43 | 0.41 | -0.29 | -2.35 | 1.77 | 0.78 | 0.42 |
| T2 | -0.39 | -1.29 | 0.51 | 0.40 | -1.57 | -3.79 | 0.65 | 0.17 | 0.31 | 0.39  | -0.51 | 1.30 | 0.39 | 1.60  | -0.62 | 3.81 | 0.16 | 0.32 |
| T3 | -0.50 | -1.50 | 0.51 | 0.33 | -0.38 | -2.62 | 1.86 | 0.74 | 0.73 | 0.52  | -0.49 | 1.53 | 0.31 | 0.38  | -1.85 | 2.62 | 0.74 | 0.69 |

---

\*Exposure amount was estimated as the proportion of daily intake to ADI and was categorized into tertiles (T1–T3), with the no intake group as reference. The models were adjusted for age, amount of exercise, sleep quality, total energy intake, and parental education time. \*\*P value reflects the difference between the early and late stages of pubertal growth.

**Table S4. Associations of sweetener consumption with fat mass and fat-free mass among boys, by Tanner stage (n = 654)**

| Sweetener    | Tanner stage | Fat mass %       |       |        |             |       |        |         |             | Fat-free mass % |         |       |        |             |       |        |       | P value **  |             |
|--------------|--------------|------------------|-------|--------|-------------|-------|--------|---------|-------------|-----------------|---------|-------|--------|-------------|-------|--------|-------|-------------|-------------|
|              |              | I & II           |       |        |             | III–V |        |         |             | I & II          |         |       |        | III–V       |       |        |       |             |             |
|              |              | Exposure amount* | β     | 95% CI | P value     | β     | 95% CI | P value | β           | 95% CI          | P value | β     | 95% CI | P value     |       |        |       |             |             |
| Acesulfame-K | 0            | ref              | -     | -      | -           | ref   | -      | -       | -           | -               | ref     | -     | -      | -           | ref   | -      | -     | -           | -           |
|              | T1           | 0.32             | -2.12 | 2.76   | 0.80        | 0.57  | -3.92  | 5.06    | 0.80        | 0.84            | -0.34   | -2.79 | 2.11   | 0.79        | -0.63 | -5.10  | 3.85  | 0.78        | 0.83        |
|              | T2           | -0.86            | -2.29 | 0.58   | 0.24        | 0.77  | -3.47  | 5.01    | 0.72        | 0.99            | 0.86    | -0.58 | 2.30   | 0.24        | -0.66 | -4.89  | 3.58  | 0.76        | 0.99        |
|              | T3           | 1.01             | -0.36 | 2.38   | 0.15        | -1.73 | -5.95  | 2.49    | 0.42        | 0.36            | -1.02   | -2.40 | 0.36   | 0.15        | 1.69  | -2.52  | 5.89  | 0.44        | 0.37        |
| Aspartame    | 0            | ref              | -     | -      | -           | ref   | -      | -       | -           | -               | ref     | -     | -      | -           | ref   | -      | -     | -           | -           |
|              | T1           | -0.84            | -2.07 | 0.39   | 0.18        | -1.89 | -4.18  | 0.40    | 0.11        | 0.38            | 0.84    | -0.39 | 2.08   | 0.18        | 1.79  | -0.49  | 4.08  | 0.13        | 0.39        |
|              | T2           | -1.88            | -3.48 | -0.28  | <b>0.02</b> | -3.33 | -5.99  | -0.68   | <b>0.02</b> | 0.53            | 1.90    | 0.29  | 3.50   | <b>0.02</b> | 3.37  | 0.71   | 6.02  | <b>0.02</b> | 0.51        |
|              | T3           | -1.19            | -2.27 | -0.11  | <b>0.03</b> | -1.71 | -5.55  | 2.13    | 0.39        | 0.93            | 1.19    | 0.11  | 2.27   | <b>0.03</b> | 1.67  | -2.17  | 5.51  | 0.40        | 0.95        |
| Sucralose    | 0            | ref              | -     | -      | -           | ref   | -      | -       | -           | -               | ref     | -     | -      | -           | ref   | -      | -     | -           | -           |
|              | T1           | -1.73            | -3.17 | -0.30  | <b>0.02</b> | 1.91  | -1.30  | 5.13    | 0.25        | 0.59            | 1.73    | 0.29  | 3.18   | <b>0.02</b> | -1.84 | -5.04  | 1.36  | 0.26        | 0.58        |
|              | T2           | -1.07            | -2.26 | 0.12   | 0.08        | -1.07 | -4.93  | 2.79    | 0.59        | 0.07            | 1.04    | -0.16 | 2.23   | 0.09        | 1.05  | -2.80  | 4.90  | 0.59        | 0.07        |
|              | T3           | 0.02             | -0.96 | 1.01   | 0.96        | -1.63 | -4.82  | 1.55    | 0.32        | 0.49            | -0.01   | -1.00 | 0.98   | 0.99        | 1.71  | -1.46  | 4.89  | 0.29        | 0.48        |
| Glycyrrhizin | 0            | ref              | -     | -      | -           | ref   | -      | -       | -           | -               | ref     | -     | -      | -           | ref   | -      | -     | -           | -           |
|              | T1           | -1.62            | -2.87 | -0.36  | <b>0.01</b> | -0.81 | -4.52  | 2.91    | 0.67        | <b>0.03</b>     | 1.65    | 0.39  | 2.90   | <b>0.01</b> | 0.77  | -2.92  | 4.47  | 0.68        | <b>0.03</b> |
|              | T2           | -0.69            | -1.75 | 0.37   | 0.20        | -0.26 | -11.68 | 11.16   | 0.96        | 0.25            | 0.73    | -0.34 | 1.80   | 0.18        | 0.26  | -11.21 | 11.72 | 0.97        | 0.24        |
|              | T3           | -0.37            | -1.60 | 0.86   | 0.56        | -5.42 | -10.34 | -0.50   | <b>0.03</b> | 0.40            | 0.39    | -0.85 | 1.63   | 0.54        | 5.50  | 0.60   | 10.39 | <b>0.03</b> | 0.40        |
| Stevioside   | 0            | ref              | -     | -      | -           | ref   | -      | -       | -           | -               | ref     | -     | -      | -           | ref   | -      | -     | -           | -           |
|              | T1           | -0.01            | -1.46 | 1.45   | 0.99        | 12.38 | 1.46   | 23.30   | <b>0.03</b> | 0.99            | -0.02   | -1.48 | 1.43   | 0.98        | 12.38 | 1.46   | 23.30 | <b>0.03</b> | 0.98        |
|              | T2           | -0.88            | -2.42 | 0.66   | 0.26        | -1.85 | -6.11  | 2.42    | 0.40        | 0.10            | 0.93    | -0.61 | 2.48   | 0.24        | -1.85 | -6.11  | 2.42  | 0.40        | 0.10        |
|              | T3           | -1.13            | -2.88 | 0.62   | 0.21        | 5.69  | -13.83 | 25.21   | 0.57        | 0.99            | 1.11    | -0.65 | 2.87   | 0.22        | 5.69  | -13.83 | 25.21 | 0.57        | 0.99        |
| Sorbitol     | 0            | ref              | -     | -      | -           | ref   | -      | -       | -           | -               | ref     | -     | -      | -           | ref   | -      | -     | -           | -           |
|              | T1           | 0.70             | -0.64 | 2.04   | 0.31        | -0.54 | -5.34  | 4.26    | 0.83        | 0.18            | -0.68   | -2.03 | 0.67   | 0.33        | 0.54  | -4.26  | 5.34  | 0.83        | 0.18        |
|              | T2           | 0.43             | -0.69 | 1.54   | 0.46        | 1.83  | -2.09  | 5.76    | 0.36        | 0.45            | -0.38   | -1.51 | 0.74   | 0.50        | -1.75 | -5.68  | 2.17  | 0.38        | 0.45        |
|              | T3           | -1.58            | -2.86 | -0.30  | <b>0.02</b> | -2.69 | -6.60  | 1.21    | 0.18        | 0.43            | 1.59    | 0.30  | 2.87   | <b>0.02</b> | 2.65  | -1.25  | 6.55  | 0.19        | 0.42        |

|                    |    |       |       |      |      |       |       |      |      |      |       |       |      |      |       |       |      |      |      |
|--------------------|----|-------|-------|------|------|-------|-------|------|------|------|-------|-------|------|------|-------|-------|------|------|------|
| <b>Added sugar</b> | 0  | ref   | -     | -    | -    | ref   | -     | -    | -    | -    | ref   | -     | -    | -    | ref   | -     | -    | -    | -    |
|                    | T1 | 0.66  | -0.41 | 1.73 | 0.23 | 0.07  | -3.52 | 3.67 | 0.97 | 0.06 | -0.64 | -1.72 | 0.44 | 0.24 | -0.09 | -3.68 | 3.49 | 0.96 | 0.06 |
|                    | T2 | -0.37 | -1.48 | 0.74 | 0.52 | -1.15 | -5.17 | 2.87 | 0.58 | 0.24 | 0.39  | -0.72 | 1.50 | 0.49 | 1.17  | -2.84 | 5.19 | 0.57 | 0.25 |
|                    | T3 | -0.15 | -1.16 | 0.87 | 0.78 | 1.65  | -2.67 | 5.96 | 0.46 | 0.41 | 0.18  | -0.83 | 1.20 | 0.72 | -1.62 | -5.92 | 2.68 | 0.46 | 0.41 |

\*Exposure amount was estimated as the proportion of daily intake to ADI and was categorized into tertiles (T1–T3), with the no intake group as reference. The models were adjusted for age, amount of exercise, sleep quality, total energy intake, and parental education time. \*\*P value reflects the difference between early and late Tanner stages.

**Table S5. Associations of sweetener consumption with fat mass and fat-free mass, by obesity group (n = 1893)**

| Sweetener    | Obesity group | Fat mass %       |        |        |             |        |        |         |                 | Fat-free mass % |         |       |        |             |       |       |      | P value**       |                 |
|--------------|---------------|------------------|--------|--------|-------------|--------|--------|---------|-----------------|-----------------|---------|-------|--------|-------------|-------|-------|------|-----------------|-----------------|
|              |               | Obesity          |        |        |             | Normal |        |         |                 | Obesity         |         |       |        | Normal      |       |       |      |                 |                 |
|              |               | Exposure amount* | β      | 95% CI | P value     | β      | 95% CI | P value | β               | 95% CI          | P value | β     | 95% CI | P value     |       |       |      |                 |                 |
| Acesulfame-K | 0             | ref              | -      | -      | -           | ref    | -      | -       | -               | -               | ref     | -     | -      | -           | ref   | -     | -    | -               | -               |
|              | T1            | -1.72            | -5.98  | 2.54   | 0.43        | 0.60   | -0.41  | 1.62    | 0.24            | 0.90            | 1.69    | -2.57 | 5.95   | 0.44        | -0.61 | -1.62 | 0.41 | 0.24            | 0.90            |
|              | T2            | 1.36             | -3.50  | 6.22   | 0.58        | -0.95  | -1.88  | -0.02   | <b>0.05</b>     | 0.24            | -1.40   | -6.26 | 3.47   | 0.57        | 0.96  | 0.03  | 1.89 | <b>0.04</b>     | 0.24            |
|              | T3            | 0.33             | -3.46  | 4.11   | 0.87        | 0.11   | -0.86  | 1.08    | 0.82            | 0.96            | -0.37   | -4.15 | 3.42   | 0.85        | -0.12 | -1.09 | 0.85 | 0.81            | 0.94            |
| Aspartame    | 0             | ref              | -      | -      | -           | ref    | -      | -       | -               | -               | ref     | -     | -      | -           | ref   | -     | -    | -               | -               |
|              | T1            | -0.26            | -2.81  | 2.30   | 0.84        | 0.26   | -0.51  | 1.03    | 0.50            | 0.74            | 0.26    | -2.29 | 2.82   | 0.84        | -0.28 | -1.05 | 0.49 | 0.48            | 0.76            |
|              | T2            | 1.18             | -2.03  | 4.40   | 0.47        | -0.92  | -1.72  | -0.12   | <b>0.02</b>     | <b>&lt;0.01</b> | -1.16   | -4.38 | 2.05   | 0.48        | 0.93  | 0.13  | 1.73 | <b>0.02</b>     | <b>&lt;0.01</b> |
|              | T3            | -2.14            | -4.94  | 0.66   | 0.14        | -0.90  | -1.68  | -0.11   | <b>0.03</b>     | 0.08            | 2.14    | -0.66 | 4.94   | 0.14        | 0.88  | 0.09  | 1.67 | <b>0.03</b>     | 0.09            |
| Sucralose    | 0             | ref              | -      | -      | -           | ref    | -      | -       | -               | -               | ref     | -     | -      | -           | ref   | -     | -    | -               | -               |
|              | T1            | 1.22             | -1.36  | 3.80   | 0.35        | 0.20   | -0.56  | 0.95    | 0.60            | 0.93            | -1.23   | -3.81 | 1.35   | 0.35        | -0.18 | -0.93 | 0.58 | 0.65            | 0.95            |
|              | T2            | 0.68             | -2.53  | 3.88   | 0.68        | -0.99  | -1.75  | -0.23   | <b>0.01</b>     | 0.22            | -0.72   | -3.93 | 2.49   | 0.66        | 0.98  | 0.22  | 1.74 | <b>0.01</b>     | 0.22            |
|              | T3            | -0.26            | -3.25  | 2.73   | 0.87        | -0.56  | -1.31  | 0.20    | 0.15            | 0.06            | 0.23    | -2.76 | 3.22   | 0.88        | 0.56  | -0.19 | 1.32 | 0.14            | 0.06            |
| Glycyrrhizin | 0             | ref              | -      | -      | -           | ref    | -      | -       | -               | -               | ref     | -     | -      | -           | ref   | -     | -    | -               | -               |
|              | T1            | -2.78            | -5.31  | -0.24  | <b>0.03</b> | -0.22  | -1.01  | 0.56    | 0.58            | <b>&lt;0.01</b> | 2.78    | 0.25  | 5.31   | <b>0.03</b> | 0.23  | -0.56 | 1.01 | 0.57            | <b>&lt;0.01</b> |
|              | T2            | 1.70             | -1.21  | 4.61   | 0.25        | -0.17  | -0.91  | 0.58    | 0.66            | 0.09            | -1.69   | -4.60 | 1.22   | 0.26        | 0.19  | -0.56 | 0.93 | 0.63            | 0.09            |
|              | T3            | -0.61            | -3.95  | 2.73   | 0.72        | -1.18  | -1.91  | -0.45   | <b>&lt;0.01</b> | <b>&lt;0.01</b> | 0.60    | -2.74 | 3.94   | 0.73        | 1.18  | 0.46  | 1.91 | <b>&lt;0.01</b> | <b>&lt;0.01</b> |
| Stevioside   | 0             | ref              | -      | -      | -           | ref    | -      | -       | -               | -               | ref     | -     | -      | -           | ref   | -     | -    | -               | -               |
|              | T1            | -0.19            | -4.27  | 3.88   | 0.93        | 0.53   | -0.58  | 1.64    | 0.35            | 0.28            | 0.25    | -3.83 | 4.33   | 0.90        | 0.53  | -0.58 | 1.64 | 0.35            | 0.26            |
|              | T2            | -0.08            | -4.64  | 4.48   | 0.97        | -0.94  | -2.12  | 0.24    | 0.12            | 0.54            | 0.04    | -4.52 | 4.60   | 0.99        | -0.94 | -2.12 | 0.24 | 0.12            | 0.55            |
|              | T3            | -4.43            | -11.43 | 2.56   | 0.22        | -0.48  | -1.70  | 0.75    | 0.44            | 0.19            | 4.42    | -2.58 | 11.42  | 0.22        | -0.48 | -1.70 | 0.75 | 0.44            | 0.20            |
| Sorbitol     | 0             | ref              | -      | -      | -           | ref    | -      | -       | -               | -               | ref     | -     | -      | -           | ref   | -     | -    | -               | -               |



|             |    |       |       |      |      |       |       |       |             |                 |       |       |      |      |       |       |      |             |                 |
|-------------|----|-------|-------|------|------|-------|-------|-------|-------------|-----------------|-------|-------|------|------|-------|-------|------|-------------|-----------------|
| Added sugar | T1 | 2.35  | -0.14 | 4.83 | 0.07 | 0.05  | -0.81 | 0.91  | 0.91        | 0.28            | -2.36 | -4.84 | 0.13 | 0.06 | -0.05 | -0.91 | 0.81 | 0.91        | 0.28            |
|             | T2 | 1.42  | -1.35 | 4.20 | 0.32 | -0.18 | -0.90 | 0.54  | 0.62        | 0.37            | -1.45 | -4.23 | 1.32 | 0.31 | 0.20  | -0.52 | 0.91 | 0.59        | 0.35            |
|             | T3 | 0.22  | -2.62 | 3.06 | 0.88 | -0.88 | -1.61 | -0.15 | <b>0.02</b> | <b>&lt;0.01</b> | -0.22 | -3.06 | 2.62 | 0.88 | 0.88  | 0.15  | 1.61 | <b>0.02</b> | <b>&lt;0.01</b> |
|             | 0  | ref   | -     | -    | -    | ref   | -     | -     | -           | -               | ref   | -     | -    | -    | ref   | -     | -    | -           | -               |
|             | T1 | 1.40  | -1.05 | 3.84 | 0.26 | 0.51  | -0.14 | 1.16  | 0.13        | 0.10            | -1.43 | -3.88 | 1.01 | 0.25 | -0.50 | -1.15 | 0.15 | 0.14        | 0.09            |
|             | T2 | 0.50  | -2.31 | 3.31 | 0.73 | -0.29 | -0.95 | 0.37  | 0.38        | 0.85            | -0.52 | -3.33 | 2.29 | 0.72 | 0.31  | -0.35 | 0.97 | 0.36        | 0.87            |
|             | T3 | -0.84 | -3.60 | 1.93 | 0.55 | -0.51 | -1.20 | 0.17  | 0.14        | 0.55            | 0.81  | -1.96 | 3.58 | 0.57 | 0.53  | -0.16 | 1.21 | 0.13        | 0.55            |

\*Exposure amount was estimated as the proportion of daily intake to ADI and was categorized into tertiles (T1–T3), with the no intake group as reference. The models were adjusted for age, amount of exercise, sleep quality, total energy intake, and parental education time. \*\*P value reflects the difference between obesity and nonobesity.
